# Supplementary material for: Transparent hydrophobic durable low moisture permeation poly(fluoroimide acrylate)/SiO2 nanocomposite from solventless photocurable resin system
Source: Royal Society of Chemistry journal article supplement (doi:10.1039/b924726b), 2010-01-01
Supplement: b924726b_b.pdf [file b924726b_b.pdf]

Table S1. Summary of performance and properties of NES and NPS series nanocomposites.

| Sample | Properties                        |                               |                     |                             |                                        |                       |                                          |                                      |                              |                                                                  |
|--------|-----------------------------------|-------------------------------|---------------------|-----------------------------|----------------------------------------|-----------------------|------------------------------------------|--------------------------------------|------------------------------|------------------------------------------------------------------|
|        | Crosshatch<br>adhesion<br>(ASTM)* | Transmittance<br>at 400nm (%) | Refractive<br>Index | Hardness<br>[Hv( $\pm$ SD)] | Young's<br>modulus<br>[GPa( $\pm$ SD)] | Td<br>( $^{\circ}$ C) | CTE<br>( $\mu$ m/m $\cdot$ $^{\circ}$ C) | Contact angle<br>[degree( $\pm$ SD)] | Water<br>absorption<br>(wt%) | Water vapor<br>permeability<br>(g $\cdot$ mm/m $^2$ $\cdot$ day) |
| NES00  | 2B                                | 99.95                         | 1.5199              | 13.25(0.13)                 | 3.16(0.09)                             | 340.01                | 212.40                                   | 73.11(1.44)                          | 8.51                         | 17.51                                                            |
| NES10  | 2B                                | 99.97                         | 1.5154              | 15.53(0.72)                 | 3.78(0.22)                             | 341.52                | 156.70                                   | 80.57(1.26)                          | 7.64                         | 12.10                                                            |
| NES20  | 2B                                | 99.99                         | 1.5092              | 17.91(0.32)                 | 4.34(0.22)                             | 343.66                | 138.00                                   | 81.07(1.20)                          | 6.23                         | 10.35                                                            |
| NES30  | 1B                                | 99.98                         | 1.4956              | 20.49(0.18)                 | 4.84(0.27)                             | 346.35                | 111.20                                   | 82.12(1.25)                          | 5.25                         | 9.17                                                             |
| NES40  | 0B                                | 99.91                         | 1.4849              | 26.12(0.82)                 | 6.73(0.34)                             | 350.51                | 105.50                                   | 86.04(1.51)                          | 4.28                         | 8.35                                                             |
| NES50  | 0B                                | 99.54                         | 1.4744              | 40.82(2.10)                 | 8.63(0.32)                             | 355.77                | 93.57                                    | 88.05(1.51)                          | 3.16                         | 7.71                                                             |
| NES60  | 0B                                | 99.98                         | 1.4675              | 54.54(2.74)                 | 10.86(0.40)                            | 361.48                | 80.30                                    | 89.77(1.58)                          | 2.57                         | 7.06                                                             |
| NPS00  | 4B                                | 95.62                         | 1.5122              | 10.10(1.47)                 | 5.32(0.44)                             | 319.42                | 148.60                                   | 82.06(1.95)                          | 1.63                         | 2.11                                                             |
| NPS10  | 4B                                | 89.89                         | 1.5049              | 14.78(1.55)                 | 6.05(0.53)                             | 334.03                | 123.50                                   | 89.72(1.72)                          | 1.35                         | 2.07                                                             |
| NPS20  | 4B                                | 90.55                         | 1.5025              | 18.28(1.83)                 | 7.86(0.49)                             | 340.97                | 120.20                                   | 96.99(1.57)                          | 1.23                         | 2.01                                                             |
| NPS30  | 4B                                | 93.55                         | 1.4974              | 22.38(1.98)                 | 9.98(0.47)                             | 348.26                | 112.80                                   | 106.21(1.58)                         | 1.09                         | 2.00                                                             |
| NPS40  | 4B                                | 93.69                         | 1.4945              | 30.86(2.27)                 | 13.20(0.77)                            | 355.48                | 90.59                                    | 119.87(1.82)                         | 1.00                         | 1.95                                                             |
| NPS50  | 3B                                | 94.77                         | 1.4878              | 47.66(2.07)                 | 18.26(0.85)                            | 366.86                | 84.19                                    | 129.60(1.50)                         | 0.86                         | 1.93                                                             |
| NPS60  | 3B                                | 96.44                         | 1.4836              | 65.00(2.52)                 | 21.98(0.81)                            | 381.03                | 77.08                                    | 141.52(0.49)                         | 0.63                         | 1.88                                                             |

\*5B, 4B, 3B, 2B, 1B and 0B demonstrate the peel area removed is 0%, less than 5%, 5-15%, 15%-35%, 35-65% and greater than 65%, respectively.
